1 **Thermosensitivity of the voltage-dependent activation of calcium homeostasis modulator 1**  
2 **(calhm1) ion channel**

3 Young Keul Jeon<sup>1,#</sup>, Si Won Choi<sup>1,#</sup>, Jae Won Kwon<sup>1</sup>, Joohan Woo<sup>3</sup>, Seong Woo Choi<sup>1,2</sup>, Sang Jeong  
4 Kim<sup>1</sup>, Sung Joon Kim<sup>1,2</sup>

5 <sup>1</sup>Department of Physiology, Seoul National University College of Medicine, <sup>2</sup>Ischemic/Hypoxic Disease  
6 Institute, Seoul National University College of Medicine, Seoul, Republic of Korea

7 <sup>3</sup>Department of Physiology and Ion Channel Disease Research Center, Dongguk University College of  
8 Medicine, Seoul, Republic of Korea

9 # These authors contributed equally.

10 **Running title:** Thermosensitivity of calhm1 channel

11 **Corresponding author:** Dr. Sung Joon Kim

12 Department of Physiology, Ischemic/Hypoxic Disease Institute, Seoul National University College of  
13 Medicine, Seoul, Republic of Korea

14 Tel: ++82-2-740-8230

15 E-mail: [physiolksj@gmail.com](mailto:physiolksj@gmail.com) [sjoonkim@snu.ac.kr](mailto:sjoonkim@snu.ac.kr)

16 **Acknowledgements**

17 This work was supported by National Research Foundation of Korea (NRF-2018R1A5A2025964) and by  
18 the 2020 Research Fund from Seoul National University Hospital to Sung Joon Kim.

19

1    **Abstract**

2    Calcium homeostasis modulator 1 (calhm1) proteins form an outwardly rectifying nonselective ion channel  
3    having exceedingly slow kinetics and low sensitivity to voltage that is shifted by lowering extracellular  
4    Ca<sup>2+</sup> ([Ca<sup>2+</sup>]<sub>e</sub>). Here we found that physiological temperature dramatically facilitates the voltage-  
5    dependent activation of the calhm1 current (*I*<sub>calhm1</sub>); increased amplitude (Q<sub>10</sub>, 7-15) and fastened speed  
6    of activation. Also, the leftward shift of the half-activation voltage (*V*<sub>1/2</sub>) was similary observed in the  
7    normal and lower [Ca<sup>2+</sup>]<sub>e</sub>. Since calhm1 is highly expressed in the brain and taste cells, the  
8    thermosensitivity should be considered in their electrophysiology.

9    **Keywords:** Calcium homeostasis modulator 1 (calhm1), thermosensitivity, voltage-dependent activation

10

## 1 Introduction

2 Calcium homeostasis modulator (calhm) family is comprised of several membrane proteins having  
3 four transmembrane (TM) domains with intracellular N- and C-termini. To distinguish the species, we  
4 denoted the human calhm as hCALHM and the mouse protein as calhm. The gene of human CALHM1  
5 (*CALHM1*) was first discovered in a search for human genes linked to enhanced risk for late-onset  
6 Alzheimer's disease [1]. Their multimeric assembly forms unselective ion channel with large pore  
7 structure, activated by membrane depolarization [1,2]. In mice, its knockout (*calhm1*<sup>-/-</sup>) impaired the long-  
8 term potentiation of hippocampal neurons [3], and a pathological role has been suggested in the  
9 ischemia-reperfusion injury of brain [4]. The expression of calhm1 has been also confirmed in taste buds,  
10 the nasal epithelium and the bladder, acting as a voltage-gated ATP-release channel [5-7]. hCALHM1  
11 contains 346 amino acids comprising four TM domains and a long C-terminal structure containing four  
12 helix domains [2,8]. According to the recent cryo-electronmicroscopy studies, the hCALHM1 and  
13 hCALHM2 are composed in an octameric and undecameric assembly, respectively [9].

14 In the electrophysiological recordings of calhm1 at room temperature, even a slightly noticeable  
15 activation requires prolonged depolarization to above 10 mV with 82 mV of half-activation voltage ( $V_{1/2}$ )  
16 [1,10,11]. Furthermore, the speed of activation was exceptionally slow, unable to reach a steady state  
17 within several seconds of the depolarized state [10,11]. Interestingly, the voltage-dependent activation of  
18 calhm1 or hCALHM1 is negatively modulated by extracellular  $Ca^{2+}$  concentration ( $[Ca^{2+}]_e$ ). By decreasing  
19  $[Ca^{2+}]_e$ , the voltage-dependence was shifted to the left, and the threshold voltage for activation was  
20 lowered [2,10].

21 The harsh conditions for activation, i.e. the low voltage-sensitivity and the slow activation kinetics  
22 under physiological ionic environment, cast doubt on to their physiological significance. Furthermore, in  
23 whole-cell patch clamp studies, the sustained clamp to high depolarization (e.g. > 40 mV) usually leads to  
24 unstable recordings in the mammalian cells, impeding precise electrophysiological studies.

25 Thermosensitivity is a key property of various ion channels, such as the vanilloid-type transient  
26 receptor potential channel (TRPV),  $Ca^{2+}$ -activated  $Cl^-$  channels, voltage-dependent proton channels, and

1 the TWIK-related K<sup>+</sup> channel (TREK) [12-17]. Here, we investigated the effects of temperature on the  
2 voltage-dependence and kinetics of the calhm1 current ( $I_{calhm1}$ ) in human embryonic kidney cells  
3 (HEK293) cells using patch-clamp techniques. The present study revealed the remarkable facilitation of  
4  $I_{calhm1}$  in the speed of activation as well as the voltage-dependence, at physiological temperatures.

5

## 6 **Materials and methods**

### 7 *Cell culture and preparation*

8 HEK293 cells were purchased from ATCC (Manassas, VA) and incubated in Dulbecco's modified  
9 Eagle's medium (DMEM; Gibco, Grand Island, NY) supplemented with 10% fetal bovine serum (FBS;  
10 Gibco) and 1% penicillin-streptomycin (Gibco). Cells were incubated at 37°C in 20% O<sub>2</sub>-5% CO<sub>2</sub>. Every  
11 day, the media was replaced with fresh media, and every 72 hours the cell were subcultured. The cells  
12 were centrifuged at 160 g for 2 min, and resuspended in fresh media. HEK293 cells at passages 5-15  
13 were used for patch clamp experiments.

### 14 *Heterologous expression of calhms*

15 The mouse or human complementary DNAs of *calhm1* (MR221396), *calhm2* (MR204675), *hCALHM1*  
16 (RC206902) and *hCLAHM3* (RC25514) were purchased from ORIGENE (Rockville, MD). All constructs  
17 were transfected into HEK293 cells using a TurboFect transfection reagent (ThermoFisher Scientific,  
18 Waltham, MA). The day before transfection, 1 x 10<sup>5</sup> cells were seeded in a 12-well culture dish. The  
19 following day, 0.5-2.5 µg/well of pCMV6 vector containing the target cDNA was transfected into the cells.  
20 Twenty-four hours after transfection, the cells were passaged at a higher dilution (~50 cells/35-mm culture  
21 dish) into fresh medium-

### 22 *Electrophysiology*

23 The cells were transferred to a bath mounted on the stage of an inverted microscope (TE20000-S;

1 Nikon, Tokyo, Japan). The bath (0.15 ml) was continuously perfused at  $5 \text{ ml}\cdot\text{min}^{-1}$ . Borosilicated glass  
2 pipettes with a free-tip resistance of  $\sim 2.5 \text{ M}\Omega$  were connected to the CV 203Bu head stage of a patch-  
3 clamp amplifier (Axopatch 200B; Axon Instruments, San Jose, CA). The series resistance, estimated by  
4 dividing the time constants of capacitive current, was kept below  $10 \text{ M}\Omega$  in the whole-cell configuration.  
5 To correct the cell size, the current amplitudes were divided by cell capacitance and expressed as  $\text{pA}\cdot\text{pF}^{-1}$ .  
6 The pipettes were pCLAMP software version 10.6.2 and Digidata-1440A (Axon Instruments) were used  
7 to acquire data and apply command pulses. The recorded currents were sampled at  $10 \text{ kHz}$  and were  
8 lowpass Bessel-filtered at  $5 \text{ kHz}$ .

### 9 *Temperature control*

10 The temperatures of the bath and cells were controlled using the in-line solution heating system  
11 (Warner Instruments, Hamden, CT), and monitored by a thermistor in the bath near the cells ( $< 300 \mu\text{m}$ ).  
12 The in-line solution heater was placed in front of bath ( $\cong 3 \text{ cm}$ ), and the heated perfusate was washed  
13 over the sample.

### 14 *Solutions and chemicals*

15 Normal Tyrode's bath solution (NT) comprised of (in mM)  $140 \text{ NaCl}$ ,  $5.4 \text{ KCl}$ ,  $2 \text{ CaCl}_2$ ,  $1 \text{ MgCl}_2$ ,  $10$   
16  $\text{glucose}$ ,  $20 \text{ mannitol}$ , and  $10 \text{ HEPES}$  [4-(2-hydroxyethyl)-1-piperazine ethanesulfonic acid], with a pH of  
17  $7.4$  (titrated with  $\text{NaOH}$ ) was used for the whole-cell patch clamp experiments. The pipette solution for  
18 whole-cell patch clamp contained (in mM)  $140 \text{ CsCl}$ ,  $1 \text{ MgCl}_2$ ,  $10 \text{ EGTA}$  [ethylene glycol-bis( $\beta$ -aminoethyl  
19 ether)- $N,N,N',N'$ -tetra acetic acid], and  $10 \text{ HEPES}$  with a pH of  $7.2$  (titrated with  $\text{CsOH}$ ). The chemicals  
20 and drugs used in this study were purchased from Sigma-Aldrich (St. Louis, MO).

### 21 *Data analysis*

22 For the analysis of the activation speed, the normalized current-time data points of the different  
23 groups of were fitted to a single exponential function. The conductance of each recording was normalized  
24 to the maximum conductance ( $G_{max}$ ) and fitted by Boltzmann equation:

1  $G/G_{max} = 1 - 1/(1+\exp[(V-V_{1/2})/k]),$

2 where  $V_{1/2}$  denotes the half maximum voltage (mV) and  $k$  is the slope factor (mV).

3 The time constant of activation,  $\tau$ , was obtained by fitting the current trace with to a single exponential  
4 function:

5  $I(t) = I_{\infty}\exp(-t/\tau),$

6 where  $I_{\infty}$  is the estimated steady stat current amplitude and  $t$  is the time after the voltage step.

7 To assess the relative change in the current amplitude for a 10 °C change in temperature, the  $Q_{10}$   
8 was calculated:

$$Q_{10} = \frac{I_{calhm1,37}}{I_{calhm1,27}}$$

9 where  $I_{calhm1,37}$  is the current amplitude of calhm1 at 37°C and  $I_{calhm1,27}$  is that at 27°C.

#### 10 *Data presentation and statistics*

11 Data are presented as the mean  $\pm$  standard deviation (S.D.). Curve fitting using the least squares  
12 method was performed in the Origin (Microcal Software) or handmade Python software. Student's  
13 unpaired t-test was used where appropriate. Differences were considered as significant when  $P < 0.05$ .

14

#### 15 **Results**

16 Using the whole-cell patch clamp with the CsCl pipette solution, step-like depolarization from -20 to  
17 40 mV (1 s), followed by repolarization to -40 mV (1 s) was applied at every 20 s. At 27°C, very small  
18 sizes of outward current ( $I_{calhm1}$ ) were induced by the depolarization. By raising the temperature of the  
19 bath perfusate to 37°C and 42°C, the amplitude of  $I_{calhm1}$  was markedly increased, showing a positive

1 correlation between the bath temperature and the amplitude of  $I_{calhm1}$  (Fig. 1A, B). The  $Q_{10}$  value of  $I_{calhm1}$   
2 at 40 mV was  $13.5 \pm 5.34$  (n=25). It was also notable that the reversibility of the temperature effect was  
3 incomplete; when normalized to the maximum amplitude at 42°C,  $I_{calhm1}$  at the returned initial temperature  
4 (27°C) was  $13.7 \pm 2.15\%$  (n=10), while  $I_{calhm1}$  at the same initial temperature (27°C) was  $4.3 \pm 0.57\%$  of  
5 the maximum amplitude (Fig. 1C).

6 Incremental levels of step pulses (ranging from 10 to 80 mV, 1 s) were applied from -40 mV of holding  
7 voltage (10 s interval between pulses), and the representative  $I_{calhm1}$  revealed slowly activating outward  
8 currents. The amplitudes of  $I_{calhm1}$  at 60 and 80 mV were similarly increased by raising the bath  
9 temperature from 27°C to 37°C or to 42°C (Fig. 1D, E). The temperature-dependent increase of the  
10 outward current was also observed in the HEK293 cells overexpressed with mouse calhm2, hCALHM1  
11 and hCALHM3 (Fig. 1D). In the empty HEK293 cells, no significant level of the slowly activating outward  
12 current was observed even at 42°C (Fig. 1E), indicating that the temperature effect was not a nonspecific  
13 leak or artifact.

14 Then we analyzed the effect of temperature on the speed of  $I_{calhm1}$  development. To this end, a  
15 prolonged step-like depolarization (from -40 to 40 mV, 10 s) was applied at 27°C, 37°C and 42°C. The  
16 averaged traces of  $I_{calhm1}$  at the different temperatures demonstrate the acceleration of  $I_{calhm1}$  development  
17 (Fig. 2A). Notably, the temperature effect appeared to require a certain duration of depolarization. The  
18 ratio of  $I_{calhm1}$  amplitudes at 37°C and 42°C ( $I/I_{42^\circ\text{C}}$ ) were varied depending on the length of depolarization,  
19 and increased steeply between 0.5 and 1 s (Fig. 2B). Although an authentic steady-state was not  
20 obtained, the development of  $I_{calhm1}$  was fitted to a single exponential function (Fig. 2A, red dashed lines).  
21 The time constants ( $\tau$ ), which reflect the activation energy for channel opening, were significantly  
22 decreased when the temperature was increased (Fig. 2C). The  $\tau$  at 40 mV were  $466.6 \pm 21.78$  (n=27),  
23  $14.0 \pm 4.01$  (n=13), and  $3.4 \pm 0.49$  s (n=16) at 27°C, 37°C and 42°C, respectively. When plotting the  
24 logarithm of the reciprocals of the time constant ( $\ln(1/\tau)$ ) of  $I_{calhm1}$  at 40 mV against the bath temperature,  
25 a positive correlation was revealed (Fig. 2D). At each temperature tested, linear correlations were also  
26 observed between the time constants and the clamp voltages. This relationship was found to shift to the  
27 left by raising the temperature (Fig. 2D). These relationships implied that the activation energy for  $I_{calhm1}$

1 was a function of the temperature and membrane potential, respectively.

2 Based on the relation between the pulse duration and the temperature effect (Fig. 2B), depolarizing  
3 step pulses with 1 s of duration were applied to analyze the voltage-dependence of  $I_{calhm1}$  and the effects  
4 of temperature (Fig. 3 and 4). It is known that the voltage-dependence of calhm1 is negatively affected by  
5 extracellular  $Ca^{2+}$  ( $[Ca^{2+}]_e$ ); a lower level of  $[Ca^{2+}]_e$  enables activation at a less depolarized state [8,10,11].  
6 We measured the  $I_{calhm1}$  at 2, 1, and 0.5 mM of  $[Ca^{2+}]_e$  with the multi-step pulse protocol. The facilitation  
7 by increased temperatures was still observed at a lower  $[Ca^{2+}]_e$  (Fig. 3A). The current-to-voltage relation  
8 (I/V curve) became steeper and the threshold voltage of activation became lower with decreasing  $[Ca^{2+}]_e$   
9 from 2 to 1 and 0.5 mM (Fig. 3B-D).

10 To further analyze the effects of temperature on the voltage-dependence of calhm1, we determined  
11 the half-activation voltage ( $V_{1/2}$ ) and slope factor ( $k$ ) obtained by fitting the conductance-to-voltage (G/V)  
12 curves of the channel with Boltzmann function (Fig. 4A-C). At 27°C in the NT solution, significant outward  
13 currents were only measured at highly depolarized voltages, with an estimated  $V_{1/2}$  of  $102.2 \pm 2.30$  mV  
14 ( $n=41$ ). At 37°C and 42°C,  $V_{1/2}$  values were  $76.4 \pm 4.32$  ( $n=25$ ) and  $50.5 \pm 3.72$  ( $n=21$ ), respectively (Fig.  
15 4D). By lowering the  $[Ca^{2+}]_e$ , the  $V_{1/2}$  was also lowered. Furthermore, an increase in the temperature  
16 significantly shifted the  $V_{1/2}$  to the left, under 1 and 0.5 mM  $[Ca^{2+}]_e$  (Fig. 4D). In contrast to the shift in  $V_{1/2}$ ,  
17 the slope factors were not affected by changing the temperature (Fig. 4E). The  $Q_{10}$  values of  $I_{calhm1}$   
18 obtained at 1 and 0.5 mM  $[Ca^{2+}]_e$  were not significantly different from those at 2 mM  $[Ca^{2+}]_e$  (Fig. 4F).

19

## 20 Discussion

21 The calhm (CALHM) is a relatively newly investigated membrane protein family forming unselective  
22 ion channels. Owing to the requirement of strong and sustained depolarization for their activation, their  
23 electrophysiological properties are poorly understood yet. Here, we firstly demonstrate the remarkable  
24 thermosensitivity of the mouse calhm1,-2 and the corresponding members of human CALHM ion  
25 channels. the amplitude of  $I_{calhm1}$  was also remarkably increased at the physiological temperature. Since



1 the aqueous diffusion of ions and the reciprocal of the viscosity of water increase 1.4-fold after a 10  
2 degree increase in the temperature, channels with a  $Q_{10}$  value higher than 5 are regarded as  
3 thermosensitive [18,19]. Since the averaged  $Q_{10}$  of calhm1, calhm2, hCALHM1 and hCALHM3 ranged  
4 from 10 to 13 (Fig. 1D), the calhm family could be safely classified as a thermosensitive channel. On  
5 depolarization, the speed of activation rose steeply by temperature, which could be fit to single  
6 exponential functions with shortened  $\tau$ , indicating the thermosensitivity of the channel gating procedure  
7 (Fig. 2).

8 The voltage-dependence of calhm1 was also sensitized by temperature. As previously reported  
9 [10,11,20],  $V_{1/2}$  was left-shifted at a lower  $[Ca^{2+}]_e$ , and was further shifted by higher temperatures (Fig. 3).  
10 Although the precise mechanism for the thermosensitivity is yet unknown, the additive effects of lower  
11  $[Ca^{2+}]_e$  and the higher temperature suggest independent mechanisms for the modulation of voltage-  
12 sensitivity.

13 Recently, cryo-electron microscopic investigations have revealed the molecular structure of the calhm  
14 channels [9,20,21]. In contrast to the undecameric assembly of hCALHM2, the structure of hCALHM1  
15 shows an octameric organization with a smaller pore diameter [20-22], which suggest that the functional  
16 properties of activation and conductance may not be conserved within the family. However, the results of  
17 the present study show that the thermosensitivity is conserved between the tested paralogs including  
18 hCALHM3.

### 19 *Physiological implication*

20 Despite the shift of  $V_{1/2}$ , the raised temperature alone could not evoke inward current at the negative  
21 holding potential (e.g. -40 mV), which is different from the classical thermo-activating channels such as  
22 TRPV1. Nevertheless, the slow kinetics of deactivation on the repolarization and the long-lasting effect of  
23 high temperature (Fig. 1C, E) suggest that a cumulative activation of calhm might affect the intrinsic  
24 excitability of the cells expressing the channels. The plausible effects of temperature could be expected in  
25 the excitable cells generating action potentials (AP). In the hippocampal and cortical neurons, the genetic  
26 knock-out of calhm1 affected their excitability [3,10]. Furthermore, the  $[Ca^{2+}]_e$  of diffusion-limited

1 intercellular spaces or synaptic cleft could be significantly lowered depending on the  $\text{Ca}^{2+}$  influx-  
2 associated AP firing [23]. In addition to the spatial fluctuation of  $[\text{Ca}^{2+}]_e$ , the present study warrants to  
3 consider the temperature effect on the roles of calhm1 *in vivo*.

4 Calhm1 channels are permeable not only to cations but also to various sizes of anions, including  
5  $\text{ATP}^{4-}$  (ATP). The ATP-permeability is thought to be responsible for the purinergic signaling between the  
6 taste receptor cells and sensory nerve endings, a process known as non-vesicular type synaptic  
7 transmission [5]. The calhm channels (calhm1 and 3) in the taste cells could be activated during the burst  
8 of APs [5,6,22]. Previous studies have reported on the temperature-dependent facilitation of some taste  
9 transduction efficiencies [24,25]. In addition to the warmth-activated TRPM5 cation channel in the  
10 gustatory cells [5,25,26], the thermosensitivity of calhm may partly explain the effects of temperature on  
11 the taste sensation. Another potential contribution of thermosensitive calhm is in the ciliary beating of the  
12 airway epithelium, where the release of ATP via calhm1 may control the ciliary beating frequency (CBF)  
13 [7]. CBF in airway is known to be markedly increased by rises in temperature from room temperature to  
14 physiological temperatures [27,28].

15 Calhm2 has been suggested to play a critical role as an ATP-releasing pathway has been also  
16 suggested in the mouse astrocytes; calhm2 mediates ATP release and the knockout of calhm2 leads to  
17 the neural dysfunction and depression-like phenotypes in mice [29]. As calhm2 was confirmed to exhibit  
18 thermosensitivity in our present study, it is likely that the release of ATP from astrocytes may be also  
19 boosted at physiological temperatures.

20 In summary, the effective temperature-dependent facilitation of the calhm1 activation was  
21 demonstrated. Our findings provide a basis for further studies with the aim of elucidating their  
22 electrophysiological properties. Also, the thermosensitivity demonstrated in the present study provides  
23 insights that could broaden the physiological understanding of the roles of calhm family channels *in vivo*.

24

25 **Acknowledgement**

1 This work was supported by National Research Foundation of Korea (NRF- 2018R1A5A2025964)  
2 and by the 2020 Research Fund from Seoul National University Hospital to Sung Joon K.

3

#### 4 **Disclosures**

5 No conflicts of interest, financial or otherwise, are declared by the author(s).

6

#### 7 **Author Contributions**

8 Young Keul J., Seong Woo C., Sang Jeong K., and Sung Joon K. designed the research; Young Keul  
9 J., Jae Won K., Si Won C., and Joo Han W. performed experiments; Young Keul J., and Jae Won K.  
10 analyzed data; Si Won C. and Seong Woo C. interpreted data; Young Keul J. prepared figures; Young  
11 Keul J. drafted manuscripts; Sung Joon K. and Sang Jeong K. edited revised manuscripts.

12

13

#### 14 **References**

15 [1] U. Dreses-Werringloer, J.C. Lambert, V. Vingtdeux, H. Zhao, H. Vais, A. Siebert, A. Jain, J. Ko  
16 ppel, A. Rovelet-Lecrux, D. Hannequin, F. Pasquier, D. Galimberti, E. Scarpini, D. Mann, C. Lendo  
17 n, D. Campion, P. Amouyel, P. Davies, J.K. Foskett, F. Campagne, P. Marambaud, A polymorphism  
18 in CALHM1 influences Ca<sup>2+</sup> homeostasis, Abeta levels, and Alzheimer's disease risk, *Cell* 133 (2  
19 008) 1149-1161. 10.1016/j.cell.2008.05.048.

20 [2] Z. Ma, J.E. Tanis, A. Taruno, J.K. Foskett, Calcium homeostasis modulator (CALHM) ion chann  
21 els, *Pflugers Arch* 468 (2016) 395-403. 10.1007/s00424-015-1757-6.

22 [3] V. Vingtdeux, E.H. Chang, S.A. Frattini, H. Zhao, P. Chandakkar, L. Adrien, J.J. Strohl, E.L. Gi  
23 bson, M. Ohmoto, I. Matsumoto, P.T. Huerta, P. Marambaud, CALHM1 deficiency impairs cerebral

- 1 neuron activity and memory flexibility in mice, *Sci Rep* 6 (2016) 24250. 10.1038/srep24250.
- 2 [4] J. Garrosa, I. Paredes, P. Marambaud, M.G. Lopez, M.F. Cano-Abad, Molecular and pharmacol  
3 ological modulation of CALHM1 promote neuroprotection against oxygen and glucose deprivation in  
4 a model of hippocampal slices, *Cells* 9 (2020). 10.3390/cells9030664.
- 5 [5] A. Taruno, V. Vingtdeux, M. Ohmoto, Z. Ma, G. Dvoryanchikov, A. Li, L. Adrien, H. Zhao, S. L  
6 eung, M. Abernethy, J. Koppel, P. Davies, M.M. Civan, N. Chaudhari, I. Matsumoto, G. Hellekant,  
7 M.G. Tordoff, P. Marambaud, J.K. Foskett, CALHM1 ion channel mediates purinergic neurotransmis  
8 sion of sweet, bitter and umami tastes, *Nature* 495 (2013) 223-226. 10.1038/nature11906.
- 9 [6] Z. Ma, W.T. Saung, J.K. Foskett, Action potentials and ion conductances in wild-type and CAL  
10 HM1-knockout type II taste cells, *J Neurophysiol* 117 (2017) 1865-1876. 10.1152/jn.00835.2016.
- 11 [7] A.D. Workman, R.M. Carey, B. Chen, C.J. Saunders, P. Marambaud, C.H. Mitchell, M.G. Tordof  
12 f, R.J. Lee, N.A. Cohen, CALHM1-Mediated ATP Release and Ciliary Beat Frequency Modulation i  
13 n Nasal Epithelial Cells, *Sci Rep* 7 (2017) 6687. 10.1038/s41598-017-07221-9.
- 14 [8] A.P. Siebert, Z. Ma, J.D. Grevet, A. Demuro, I. Parker, J.K. Foskett, Structural and functional si  
15 milarities of calcium homeostasis modulator 1 (CALHM1) ion channel with connexins, pannexins, a  
16 nd innexins, *J Biol Chem* 288 (2013) 6140-6153. 10.1074/jbc.M112.409789.
- 17 [9] W. Choi, N. Clemente, W. Sun, J. Du, W. Lu, The structures and gating mechanism of human  
18 calcium homeostasis modulator 2, *Nature* 576 (2019) 163-167. 10.1038/s41586-019-1781-3.
- 19 [10] Z. Ma, A.P. Siebert, K.H. Cheung, R.J. Lee, B. Johnson, A.S. Cohen, V. Vingtdeux, P. Maram  
20 baud, J.K. Foskett, Calcium homeostasis modulator 1 (CALHM1) is the pore-forming subunit of an  
21 ion channel that mediates extracellular Ca<sup>2+</sup> regulation of neuronal excitability, *Proc Natl Acad Sci*  
22 *U S A* 109 (2012) E1963-1971. 10.1073/pnas.1204023109.
- 23 [11] J.E. Tanis, Z. Ma, J.K. Foskett, The NH<sub>2</sub> terminus regulates voltage-dependent gating of CAL  
24 HM ion channels, *Am J Physiol Cell Physiol* 313 (2017) C173-C186. 10.1152/ajpcell.00318.2016.
- 25 [12] C. Arrigoni, D.L. Minor, Jr., Global versus local mechanisms of temperature sensing in ion cha  
26 nnels, *Pflügers Arch* 470 (2018) 733-744. 10.1007/s00424-017-2102-z.
- 27 [13] M.R. Cohen, V.Y. Moiseenkova-Bell, Structure of thermally activated TRP channels, *Curr Top*  
28 *Membr* 74 (2014) 181-211. 10.1016/B978-0-12-800181-3.00007-5.

- 1 [14] I. Diaz-Franulic, H. Poblete, G. Mino-Galaz, C. Gonzalez, R. Latorre, Allosterism and Structure  
2 in Thermally Activated Transient Receptor Potential Channels, *Annu Rev Biophys* 45 (2016) 371-3  
3 98. 10.1146/annurev-biophys-062215-011034.
- 4 [15] D. Kang, C. Choe, D. Kim, Thermosensitivity of the two-pore domain K<sup>+</sup> channels TREK-2 an  
5 d TRAAK, *J Physiol* 564 (2005) 103-116. 10.1113/jphysiol.2004.081059.
- 6 [16] H. Lin, I. Jun, J.H. Woo, M.G. Lee, S.J. Kim, J.H. Nam, Temperature-dependent increase in t  
7 he calcium sensitivity and acceleration of activation of ANO6 chloride channel variants, *Sci Rep* 9  
8 (2019) 6706. 10.1038/s41598-019-43162-1.
- 9 [17] F. Maingret, I. Lauritzen, A.J. Patel, C. Heurteaux, R. Reyes, F. Lesage, M. Lazdunski, E. Ho  
10 nore, TREK-1 is a heat-activated background K<sup>+</sup> channel, *EMBO J* 19 (2000) 2483-2491. 10.1093/  
11 emboj/19.11.2483.
- 12 [18] B. Frankenhaeuser, L.E. Moore, The effect of temperature on the sodium and potassium perm  
13 eability changes in myelinated nerve fibres of *Xenopus Laevis*, *J Physiol* 169 (1963) 431-437. 10.1  
14 113/jphysiol.1963.sp007269.
- 15 [19] K.G. Beam, P.L. Donaldson, A quantitative study of potassium channel kinetics in rat skeletal  
16 muscle from 1 to 37°C, *J Gen Physiol* 81 (1983) 485-512. 10.1085/jgp.81.4.485.
- 17 [20] J.L. Syrjanen, K. Michalski, T.H. Chou, T. Grant, S. Rao, N. Simorowski, S.J. Tucker, N. Grigo  
18 rief, H. Furukawa, Structure and assembly of calcium homeostasis modulator proteins, *Nat Struct*  
19 *Mol Biol* 27 (2020) 150-159. 10.1038/s41594-019-0369-9.
- 20 [21] K. Drozdzyk, M. Sawicka, M.I. Bahamonde-Santos, Z. Jonas, D. Deneka, C. Albrecht, R. Dutzl  
21 er, Cryo-EM structures and functional properties of CALHM channels of the human placenta, *Elife*  
22 9 (2020). 10.7554/eLife.55853.
- 23 [22] K. Nomura, M. Nakanishi, F. Ishidate, K. Iwata, A. Taruno, All-Electrical Ca<sup>2+</sup>-Independent Sig  
24 nal Transduction Mediates Attractive Sodium Taste in Taste Buds, *Neuron* 106 (2020) 816-829 e81  
25 6. 10.1016/j.neuron.2020.03.006.
- 26 [23] D.A. Rusakov, A. Fine, Extracellular Ca<sup>2+</sup> depletion contributes to fast activity-dependent mod  
27 ulation of synaptic transmission in the brain, *Neuron* 37 (2003) 287-297. 10.1016/s0896-6273(03)00  
28 025-4.

- 1 [24] B.G. Green, C. Alvarado, K. Andrew, D. Nachtigal, The effect of temperature on umami taste,  
2 Chem Senses 41 (2016) 537-545. 10.1093/chemse/bjw058.
- 3 [25] C.H. Lemon, Modulation of taste processing by temperature, Am J Physiol Regul Integr Comp  
4 Physiol 313 (2017) R305-R321. 10.1152/ajpregu.00089.2017.
- 5 [26] K. Talavera, K. Yasumatsu, T. Voets, G. Droogmans, N. Shigemura, Y. Ninomiya, R.F. Margols  
6 kee, B. Nilius, Heat activation of TRPM5 underlies thermal sensitivity of sweet taste, Nature 438 (2  
7 005) 1022-1025. 10.1038/nature04248.
- 8 [27] C.F. Clary-Meinesz, J. Cosson, P. Huitorel, B. Blaive, Temperature effect on the ciliary beat fre  
9 quency of human nasal and tracheal ciliated cells, Biol Cell 76 (1992) 335-338. 10.1016/0248-4900  
10 (92)90436-5.
- 11 [28] A. Green, L.A. Smallman, A.C. Logan, A.B. Drake-Lee, The effect of temperature on nasal cili  
12 ary beat frequency, Clin Otolaryngol Allied Sci 20 (1995) 178-180. 10.1111/j.1365-2273.1995.tb0004  
13 0.x.
- 14 [29] M. Jun, Q. Xiaolong, Y. Chaojuan, P. Ruiyuan, W. Shukun, W. Junbing, H. Li, C. Hong, C. Ji  
15 nbo, W. Rong, L. Yajin, M. Lanqun, W. Fengchao, W. Zhiying, A. Jianxiong, W. Yun, Z. Xia, Z. Ch  
16 en, Y. Zengqiang, Calhm2 governs astrocytic ATP releasing in the development of depression-like  
17 behaviors, Mol Psychiatry 23 (2018) 1091. 10.1038/mp.2017.254.
- 18
- 19

## 1 Figure Legends

2 Figure 1. Thermosensitivity of calhm1 and CALHMs. (A) a representative chart trace of  $I_{calhm1}$  (black  
3 line) activated by repetitive step pulses from -20 to 40 mV (1 s). The bath temperature was  
4 concomitantly recorded, and changed from 27 to 42°C (dotted line). *Inset* figure shows representative  
5  $I_{calhm1}$  measured at 27 and 42°C, and the pulse protocol. (B) semi-logarithmic plot of the normalized  
6 amplitude of  $I_{calhm1}$  and bath temperature. From the data obtained from 12 cells as demonstrated in (A),  
7 the amplitude of  $I_{calhm1}$  was normalized to the maximum current at 42°C. The least-squares fitting of the  
8 data reveals a positive correlation between the bath temperature and  $I_{calhm1}$ . (C) Normalized amplitudes of  
9 the  $I_{calhm1}$  at 27°C against 42°C ( $I/I_{@42}$ ), and their averaged summary comparing before and after the  
10 temperature change (n=10, \*\*\* $P<0.001$ ). (D) Summary of the  $Q_{10}$  values at 60 and 80 mV in HEK293  
11 cells overexpressing calhm1, calhm2, hCALHM1, and hCALHM3. (E) Representative traces of  $I_{calhm1}$   
12 activated by incremental levels of step pulses (ranging from 10 to 80 mV, 1 s). The current amplitudes  
13 were increased at higher bath temperature.

14  
15 Figure 2. Effects of temperature on the speed of  $I_{calhm1}$  activation. (A) averaging traces of  $I_{calhm1}$   
16 evoked by 10s of depolarization (40 mV) at three different temperatures (black line). Traces were fitted to  
17 single exponential function (red line). (B) Relative amplitudes of  $I_{calhm1}$  under 27°C and 37°C at different  
18 times of sustained depolarization normalized to the corresponding  $I_{calhm1}$  at 42°C ( $I/I_{@42}$ ). Steep increase  
19 was observed between 0.5 and 1 s. (C) Summary of the time constants at different temperatures at 27°C  
20 (n=22), 37°C (n=16) and 42°C (n=18). \*\*\*,  $P<0.001$ . (D, E) Arrhenius plots of the speed of  $I_{calhm1}$  activation  
21 at different temperature and membrane potentials. The logarithm of the reciprocals of the time constant  
22 ( $\ln(1/\tau)$ ) of  $I_{calhm1}$  were affected by the bath temperature (D) as well as the membrane potentials (E).

23  
24 Figure 3. Voltage-dependence of  $I_{calhm1}$  and the effects of temperature and  $[Ca^{2+}]_e$ . (A) representative  
25 trace of  $I_{calhm1}$  at different  $[Ca^{2+}]_e$  (2 mM, 1 mM, and 0.5 mM) and temperature (27°C (blue), 37°C (black),

1 and 42°C (red)) conditions.  $I_{calhm1}$  were obtained by depolarization to 40 mV (upper panels) and 80 mV  
2 (lower panels). (B-D) current-to-voltage relations (I/V curves) of  $I_{calhm1}$  obtained by incremental levels of  
3 step pulse (ranging from -60 to 160 mV, 1 s) under different  $[Ca^{2+}]_e$  and temperature (square; 27°C, circle;  
4 37°C, and triangle; 42°C).  $[Ca^{2+}]_e$  was 2 mM (B), 1 mM (C), and 0.5 mM (D).

5 Figure 4. Analyses of the temperature- and  $[Ca^{2+}]_e$  effects on the voltage dependence of  $I_{calhm1}$ . (A-C)  
6 whole-cell conductance to voltage relations (G/V curves) of  $I_{calhm1}$  relationship under 2 mM (A), 1 mM (B),  
7 and 0.5 mM (C) of  $[Ca^{2+}]_e$  and at different temperature. (D, E) summary of the half maximum activation  
8 voltages ( $V_{1/2}$ ) and slope factors ( $k$ ) obtained by fitting the G/V curves to Boltzman equation. Decreases,  
9 i.e. leftward shift, of  $V_{1/2}$  by raised temperature was commonly observed at different  $[Ca^{2+}]_e$  (D). In  
10 contrast,  $k$  was affected neither by  $[Ca^{2+}]_e$  nor by temperature (E). (F) Effects of  $[Ca^{2+}]_e$  on  $Q_{10}$  values. At  
11 the same voltage, the ratio of  $I_{calhm1, @37^\circ C} / I_{calhm1, @27^\circ C}$  ( $Q_{10}$ ) were not affected by the bath temperature.

12

13



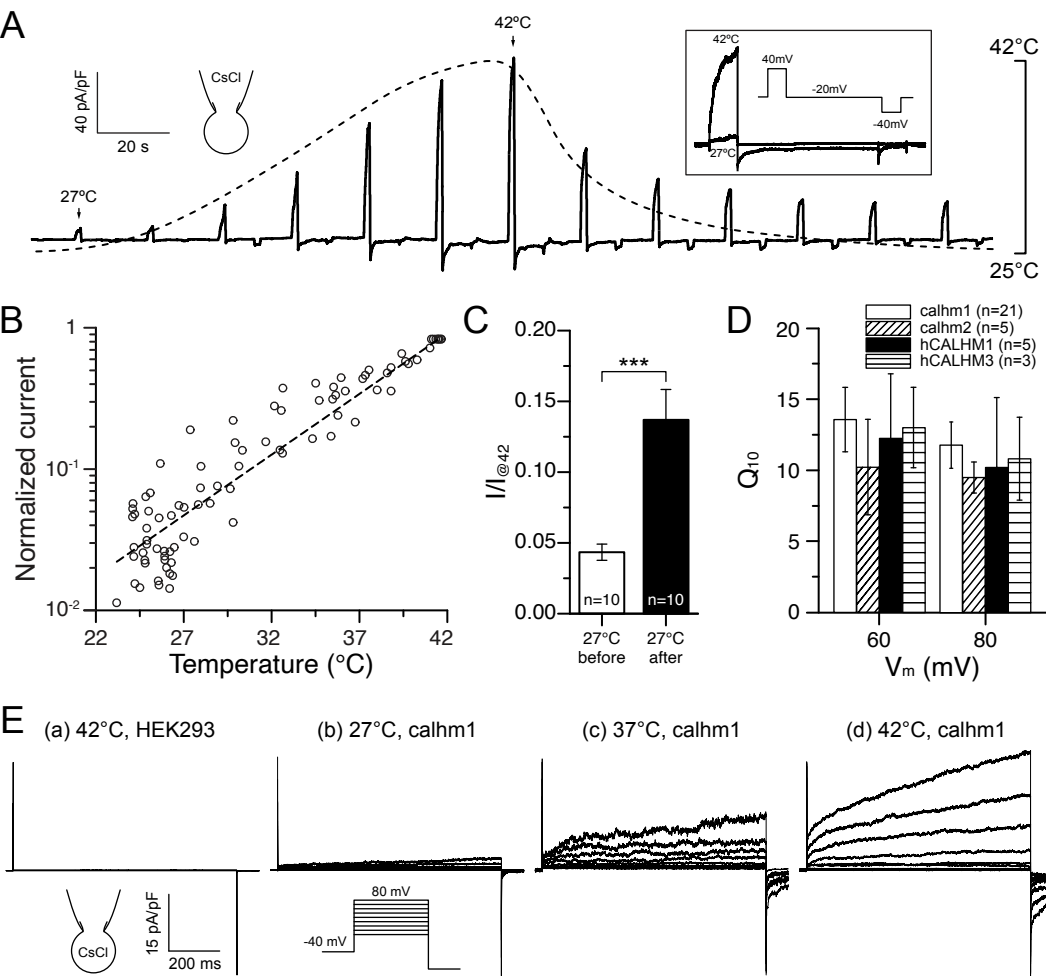

Fig. 1

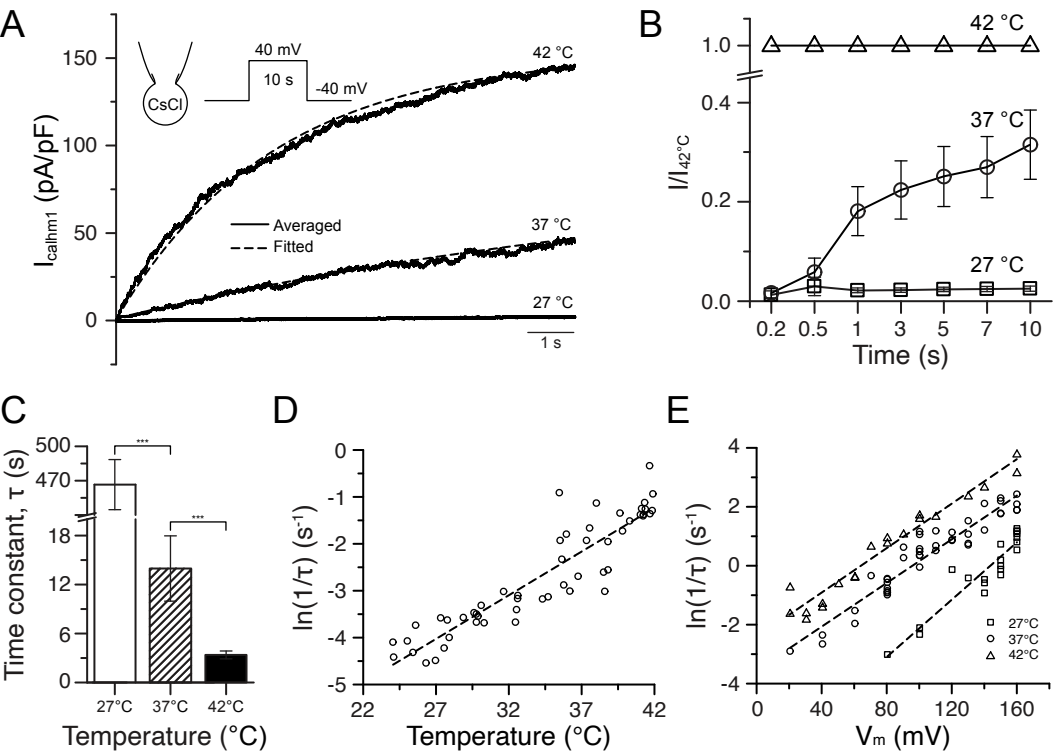

Fig. 2

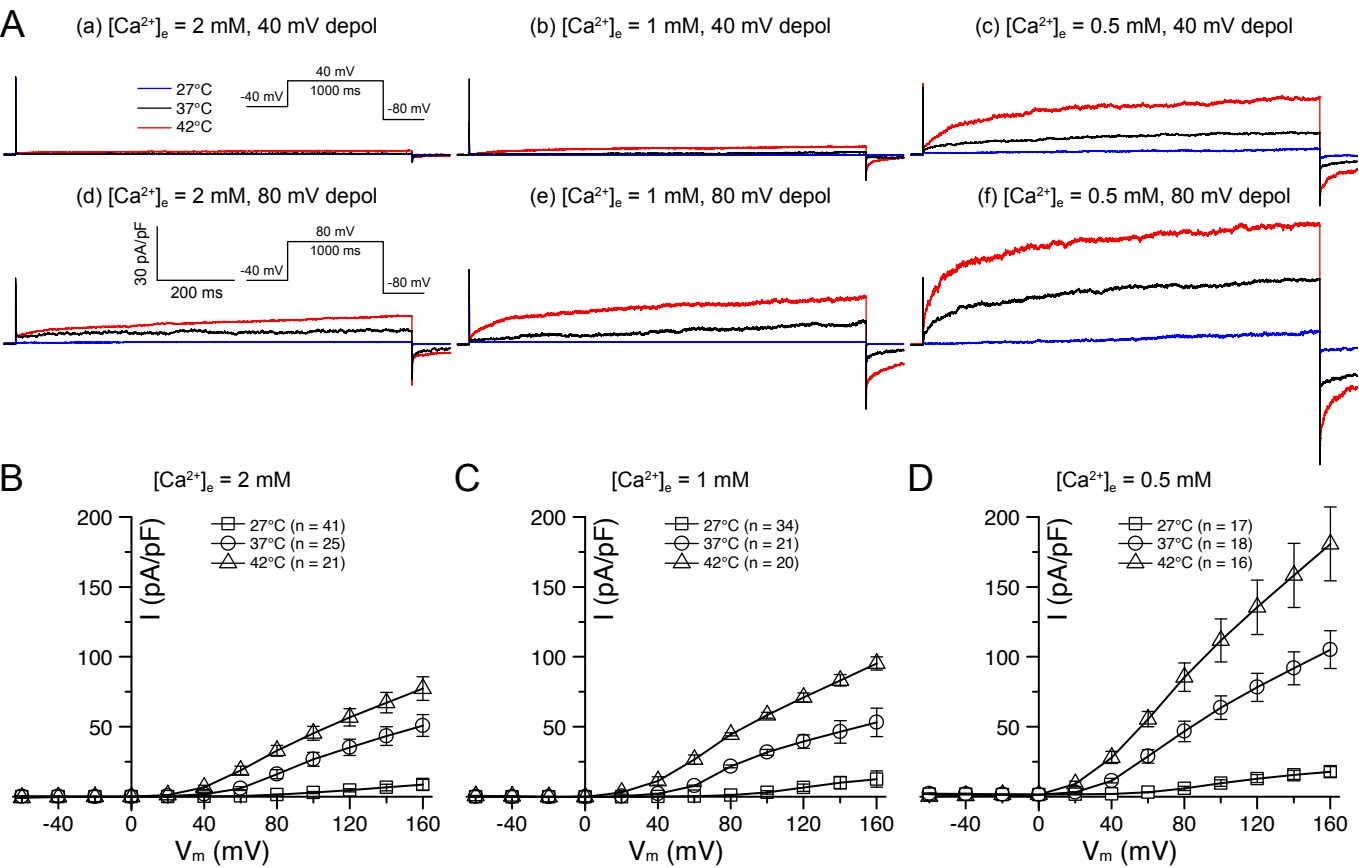

Fig. 3

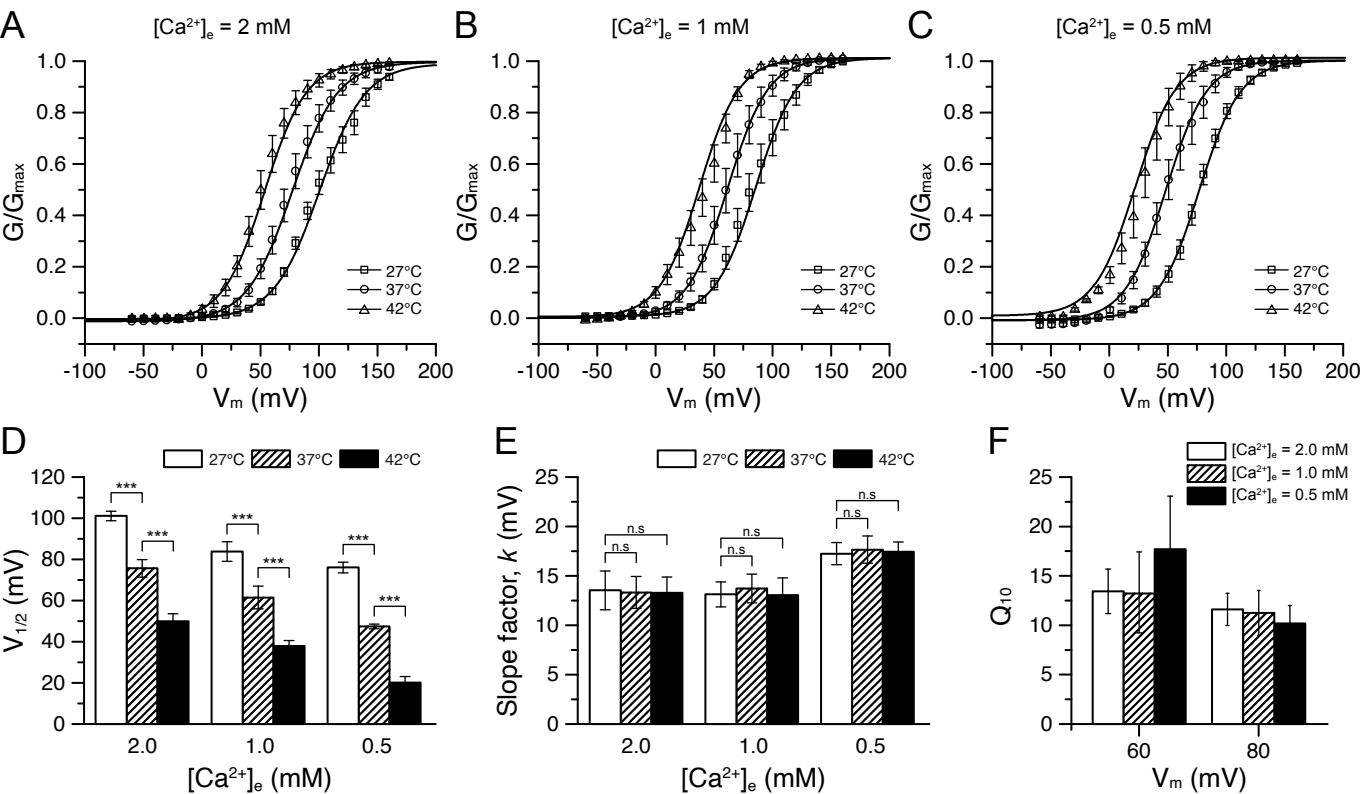

Fig. 4
